# Supplementary material
Source: publisher figshare collection journal article supplement (https://acs.figshare.com/ndownloader/files/8574025)
Supplement: Supplementary file 1 [file 8574025]

## Supporting information

### **Multi-hierarchical Structure of Hybridized Phosphates Anchored on Reduced Graphene Oxide for High Power Hybrid Energy Storage Devices**

Miao Wang<sup>1,2#</sup>, Fengdan Jin<sup>1,2#</sup>, Xuejiao Zhang<sup>1,2#</sup>, Jing Wang<sup>1,2</sup>, Shifei Huang<sup>2</sup>, Xinyu Zhang<sup>1,2\*</sup>,  
Shichun Mu<sup>3</sup>, Yueping Zhao<sup>2</sup>, Yufeng Zhao<sup>1,2\*</sup>

<sup>1</sup> *State Key Laboratory of Metastable Materials Science and Technology, Yanshan University, Qinhuangdao 066004, P.R. China,*

<sup>2</sup> *Key Laboratory of Applied Chemistry, Yanshan University, Qinhuangdao, 066004, China.*

<sup>3</sup> *State Key Laboratory of Advanced Technology for Materials Synthesis and Processing, Wuhan University of Technology, Wuhan 430070, PR China*

<sup>#</sup>*These authors contribute equally to this work.*

\*Corresponding Authors: E-mail: [xyzhang@ysu.edu.cn](mailto:xyzhang@ysu.edu.cn) (Zhang X.), [yufengzhao@ysu.edu.cn](mailto:yufengzhao@ysu.edu.cn) (Zhao Y.)

## Content

|                                                                                                                                             |                   |
|---------------------------------------------------------------------------------------------------------------------------------------------|-------------------|
| TEM images NCNP .....                                                                                                                       | <b>Figure. S1</b> |
| Typical FESEM images .....                                                                                                                  | <b>Figure. S2</b> |
| CV and GCD curves of (Ni,Co)(OH) <sub>2</sub> /GO composites. ....                                                                          | <b>Figure. S3</b> |
| CV curves, GCD curves, specific capacity calculated,Cycling<br>performance and the Nyquist plots of NCNP/RGO and NCNP .....                 | <b>Figure. S4</b> |
| FESEM image, XRD pattern, CVcurves, and GCDcurves .....                                                                                     | <b>Figure. S5</b> |
| CV curve, slope of the peak current ,the b-values in the hybrid,charge<br>process,discharge process,capacity contributionNCNP/RGO//HPC..... | <b>Figure. S6</b> |
| Table S1. Performances comparison of as-made NCNP/RGO with pure NCNP.....                                                                   | <b>Table.S1</b>   |

## Experimental materials

Reagents cobalt nitrate hexahydrate ( $\text{Co}(\text{NO}_3)_2 \cdot 6\text{H}_2\text{O}$ ), nickel nitrate hexahydrate ( $\text{Ni}(\text{NO}_3)_2 \cdot 6\text{H}_2\text{O}$ ), graphene oxide (GO) colloid (2 mg/mL), ammonium phosphate ( $(\text{NH}_4)_2\text{HPO}_4$ ), ammonia ( $\text{NH}_3 \cdot \text{H}_2\text{O}$ ) (2 M), potassium hydroxide (KOH) (6 M), polytetrafluoroethylene (PTFE, 1 wt. % water suspension), and absolute ethanol are commercially available with analytical grade. All stock solutions used in this work were prepared with deionized water.

## Synthesis of $(\text{Ni},\text{Co})(\text{OH})_2/\text{GO}$ nanocomposites precursor

The cobalt nickel hydroxide/GO  $(\text{Ni},\text{Co})(\text{OH})_2/\text{GO}$  nanocomposites were prepared through a simple hydrothermal method. Firstly, 0.432 mmol  $\text{Ni}(\text{NO}_3)_2 \cdot 6\text{H}_2\text{O}$  and 0.432 mmol  $\text{Co}(\text{NO}_3)_2 \cdot 6\text{H}_2\text{O}$  were dissolved in 35 mL of deionized water, magnetic stirred for fifteen minutes to obtain a light pink solution, then 25 mL GO colloid (2 mg/mL) was added and vigorous ultrasonic stirring for 1h. After this 2 mL ammonia solution (2 mol/L) was dropwise added. The mixed solution was kept at 120°C for 4 h in a Teflon lined autoclave, and then cooled down naturally to room temperature. The dark solid was collected by centrifugation and thoroughly washed with deionized water and ethanol.

## Characterizations

Powder X-ray diffraction (XRD) patterns were recorded on an X-ray diffractometer (Rigaku,  $\lambda = 1.5418 \text{ \AA}$ ). Field emission scanning electron microscopy (FESEM) images were taken with a Hitachi SU-8030 field emission scanning electron microscope at the acceleration voltage of 15 kV, and further confirmed on transmission electron microscopy (TEM) equipped with SAED (Hitachi-7650, 100 kV 10  $\mu\text{A}$ ).

## Electrochemical measurement

For electrochemical measurements, the working electrode was prepared by mixing the products of NCNP/RGO, acetylene black, and polytetrafluoroethylene (PTFE, 1 wt. % water suspension) binder with a weight ratio of 85:10:5. The slurry was pressed onto a nickel foam current collector, vacuum drying 12 h at 70°C. Each electrode contained about 3.0 mg of electroactive materials with geometric surface area of about 1  $\text{cm}^2$ . A platinum plate and Hg/HgO (1 M KOH) electrode were used as the

counter and reference electrodes, respectively. Cyclic voltammetry (CV) and the electrochemical impedance spectra (EIS) were tested on a CHI660C electrochemical workstation (Chenhua, China) in 6 M KOH electrolyte. Current charge-discharge test was performed on a LAND battery program-control test system (Land, CT2001A, China).

The electrode capacitance ( $C$ ) was calculated from the following equation:

$$C = \frac{I}{m \frac{dV}{dt}} \quad (\text{eq.1}), \text{ where } I (\text{A cm}^{-2}) \text{ is the discharge current, } m (\text{g cm}^{-2}) \text{ is the mass of}$$

active materials, and  $(dV)/(dt)$  ( $\text{V s}^{-1}$ ) is the gradient of discharge curves. The power density ( $P$ ) and the energy density ( $E$ ) of HC corresponds the two electrodes were

calculated from the equations:  $P = E/\Delta t$  (eq.2) and  $E = \frac{1}{2} C \cdot (\Delta V)^2$  (eq.3), respectively,

where  $\Delta V$  (V) is the potential window of discharge curve,  $\Delta t$  is the discharge time consumed in the potential range of  $\Delta V$ .

#### Hybrid Device Fabrication

The hybrid device (NCNP/RGO//HPC) is constructed with appropriate amount of hierarchical porous carbon (HPC) as the negative electrode, the as prepared NCNP/RGO composites as the positive electrode, glass fiber membrane as a septum and 6 M KOH as the electrolyte. Balancing the charges stored at the positive electrode ( $\Delta Q_+$ ) and the negative electrode ( $\Delta Q_-$ ) to build a HC with a high operating voltage and high energy density is very important. Following the relationship of  $\Delta Q_+ = \Delta Q_-$ , the mass ratio of positive and negative electrodes ( $m_+/m_-$ ), can be calculated by equation  $m_+/m_- = C_- \cdot \Delta E_- / C_+ \cdot \Delta E_+$ , where  $C_+$  and  $C_-$  represent the specific capacitance values of the positive and negative electrodes, respectively, and  $\Delta E$  is the potential range. Based on this the loading amount of positive and negative active materials are  $1.6 \text{ mg cm}^{-2}$  and  $4.0 \text{ mg cm}^{-2}$ , respectively, with the total loading of  $5.6 \text{ mg cm}^{-2}$ . Both electrodes were prepared by mixing active materials, acetylene black, and polytetrafluoroethylene (PTFE, 1 wt. % water suspension) with a mass ratio of 85:10:5, which were then pressed on nickel foam and dried at  $70^\circ\text{C}$  for 12 h.

**Supporting Figure**

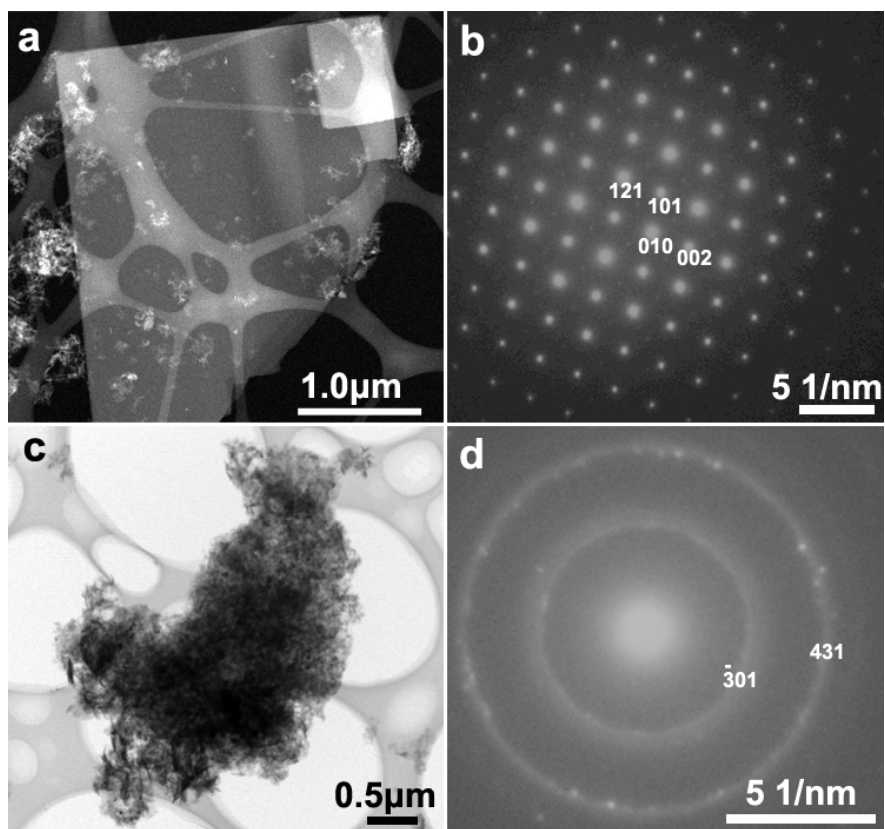

**Figure S1.** TEM images of NCNP with the structure of micro-sized platelet (a), nanopieces (c), and their SAED patterns (b, d).

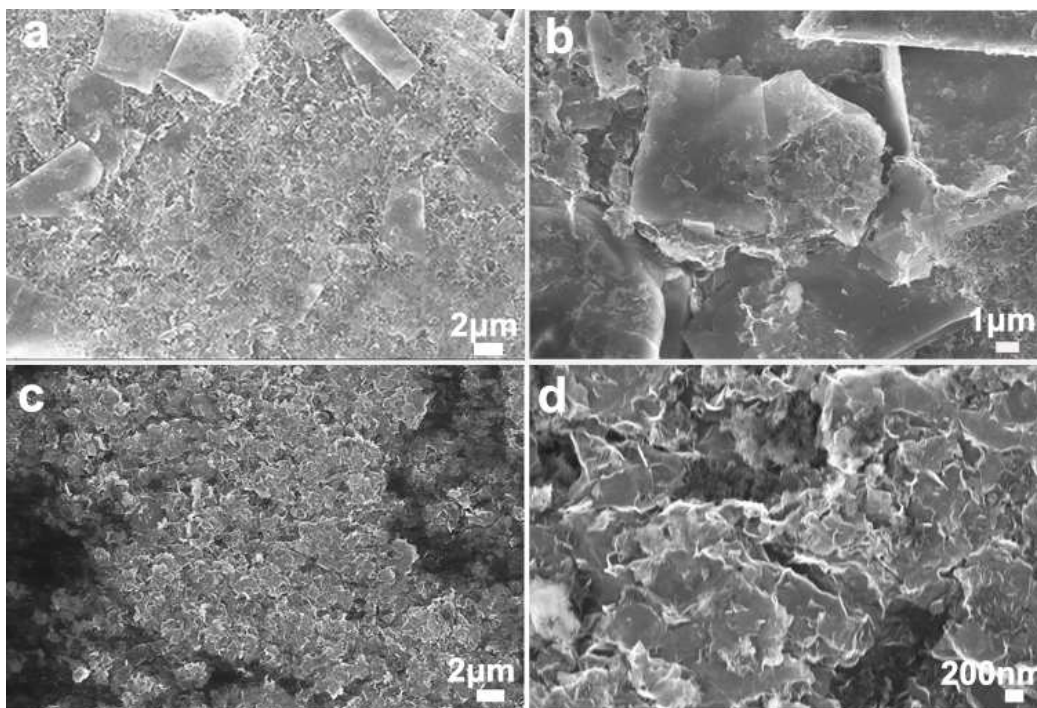

**Figure.S2.** Typical FESEM images at different magnifications at different magnifications of the (a, b) NCNP/RGO, and (Ni,Co)(OH)<sub>2</sub>/GO (c, d).

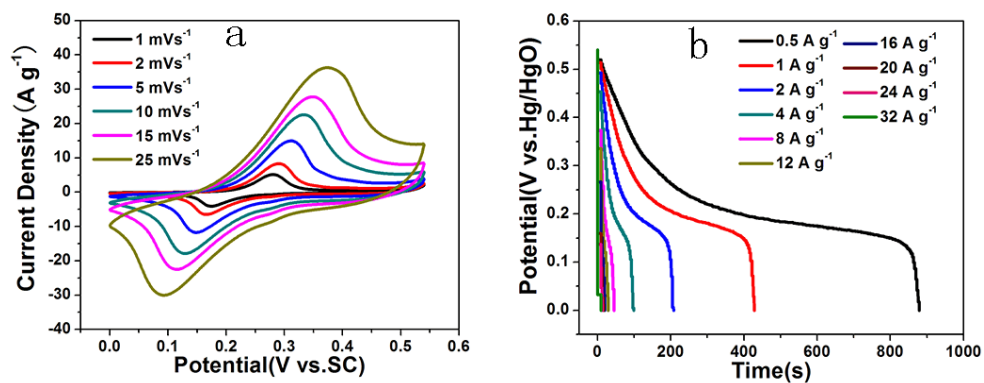

**Fig. S3.** CV curves at different scan rates of the as prepared (Ni,Co)(OH)<sub>2</sub>/GO composites (a). GCD curves at different current densities of the as prepared (Ni,Co)(OH)<sub>2</sub>/GO composites (b).

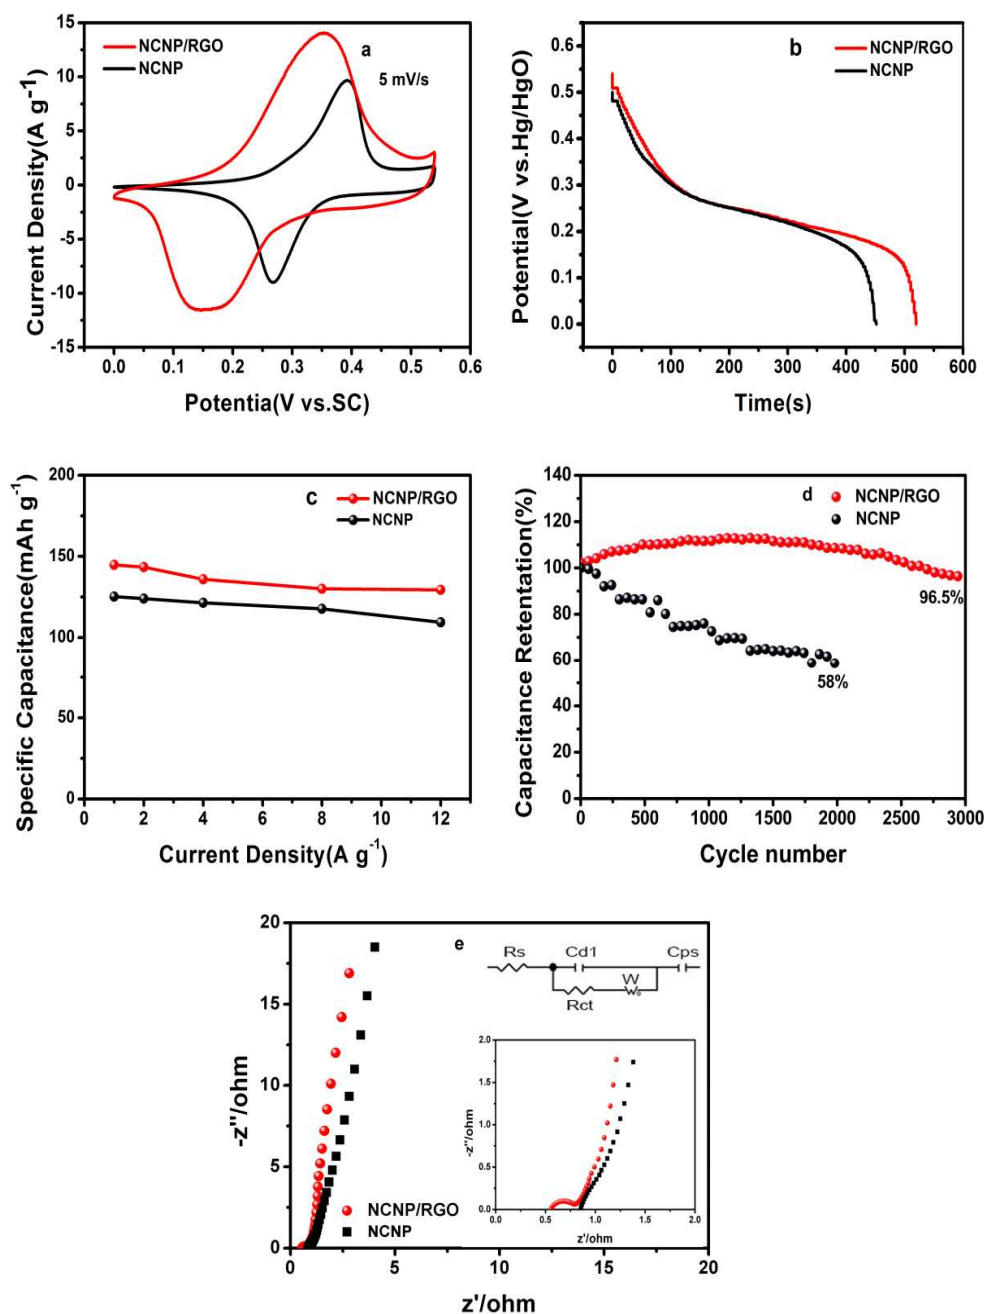

**Fig. S4.** CV curves of the NCNP/RGO and NCNP at a scanning rate of 5 mV s<sup>-1</sup> (a). GCD plots of NCNP/RGO and NCNP at 1 A g<sup>-1</sup> (b). The specific capacity calculated from different samples at different current densities (c). Cycling performance of NCNP/RGO and NCNP at a current density of 5 A g<sup>-1</sup> (d). The Nyquist plots (e).



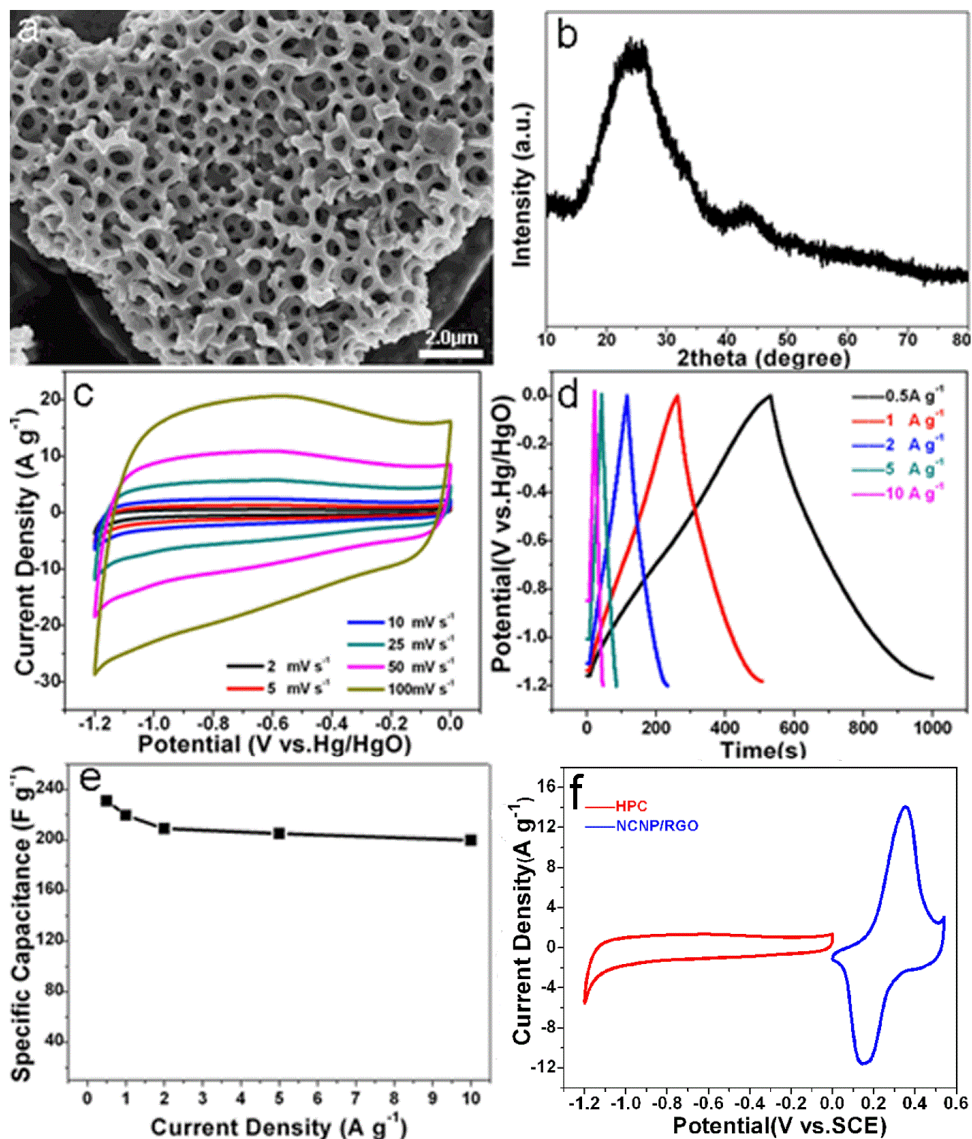

**Fig. S5.** FESEM image (a), XRD pattern (b), CV curves at different scan rates (c), (d) GCD curves at different current densities. SC as a function of discharge current densities of HPC (e), CV curves of NCNP/RGO and HPC at 5 mV s<sup>-1</sup> (f).

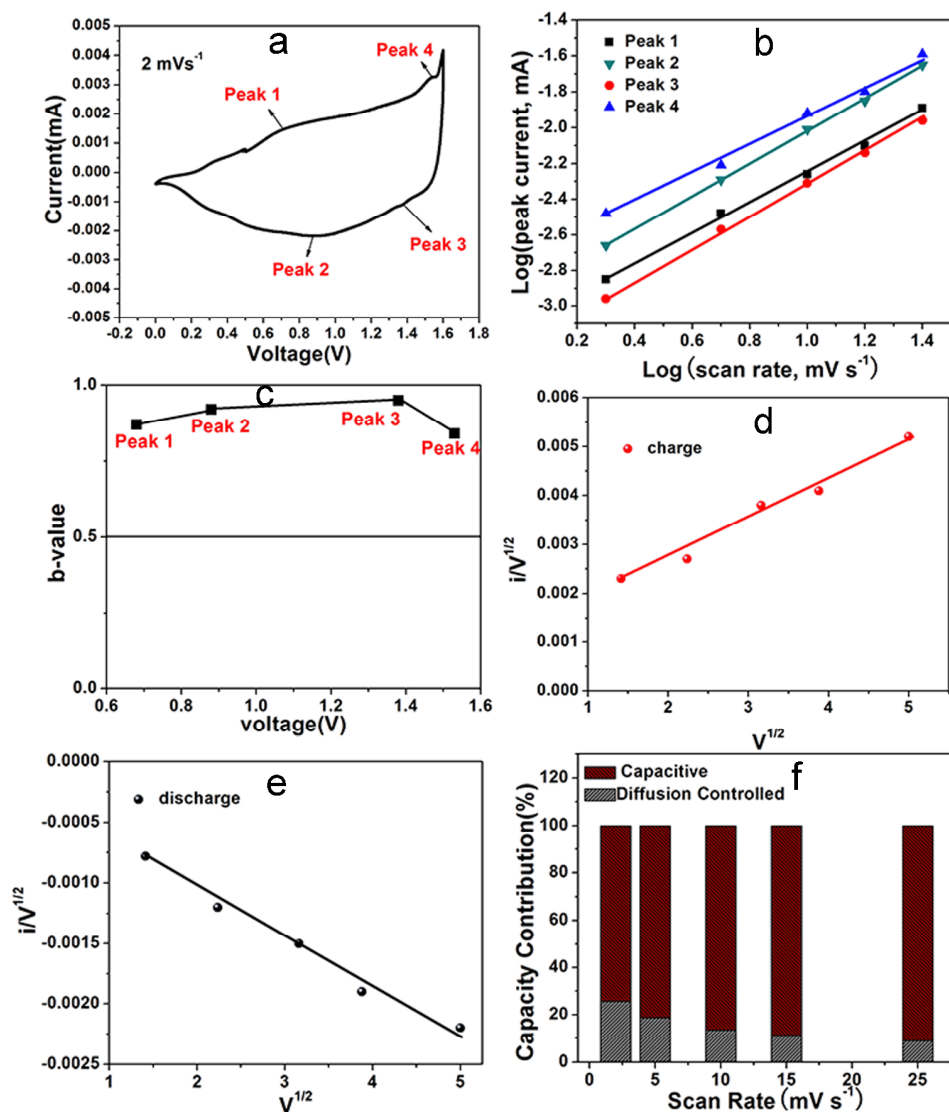

**Fig. S6.** Cycle voltammetry curve of NCNP/RGO//HPC at a scan rate of 2 mV s<sup>-1</sup> (a), Slope of the peak current versus the potential scan rate in a logarithm scale at different anodic and cathodic peaks position (b), the b-values corresponding to different electrochemical centers in the hybrid. “Linear behavior of  $i(V)/v^{1/2}$  as a function of  $v^{1/2}$  (c), charge process (d), discharge process. This is used to determine the slope ( $k_1$ ) and intercept ( $k_2$ ) of the equation 4 (e), the capacity contribution at different scan rate (2, 5, 10, 15, and 25 mV s<sup>-1</sup>) (f) .

The high capacity can be divided into capacitive-controlled and diffusion-controlled capacity. In other words, the total current is contributed by two types of mechanism: the capacitive-controlled behavior which includes both the

non-Faradaic electrical double layer capacitance (EDLC) and the surface pseudocapacitance, and the diffusion-controlled Faradaic reaction<sup>S1</sup>. Previously, Zhao et al<sup>S2</sup> used the following method to further quantify the capacitive and diffusion limited contributions to the total capacity, in which the current response (i) at a certain voltage (V) is regarded to be contributed from capacitive (k<sub>1</sub>) and diffusion (k<sub>2</sub>) controlled process:

$$i(V) = k_1V + k_2V^{1/2} \quad (\text{eq.4})$$

Here k<sub>1</sub> and k<sub>2</sub> represent the contributions from the capacitive behaviours and the diffusion-controlled Faradaic intercalation process, respectively. **Fig. S6a** shows cycle voltammetry curve of NCNP/RGO//HPC at a scan rate of 2 mV s<sup>-1</sup>, the different anodic and cathodic peaks were chosen for further analysis. A linear plot of i (V)/versus (**Figure S6 d-e**) was adopted to calculate the slope (k<sub>1</sub>) and intercept (k<sub>2</sub>). Following this we can estimate the fraction of the current due to each of these contributions at specific voltages.

**Table S1.** Performances comparison of as-made NCNP/RGO with pure NCNP

| Subject  | Power density<br>(Wh kg <sup>-1</sup> ) | Energy density<br>(Wkg <sup>-1</sup> ) | Specific capacitance<br>(mAh g <sup>-1</sup> ) | Cycling stability<br>(%) |
|----------|-----------------------------------------|----------------------------------------|------------------------------------------------|--------------------------|
| NCNP     | 4400                                    | 30.9                                   | 109.3<br>(12 A g <sup>-1</sup> )               | 58<br>(2000 cycles)      |
| NCNP/RGO | 14000                                   | 32.9                                   | 129.3<br>(12 A g <sup>-1</sup> )               | 97<br>(3000 cycles)      |

## References

(S1) Sathiya, M.; Prakash, A. S.; Ramesha, K.; Tarascon, J. M.; Shukla, A. K. V<sub>2</sub>O<sub>5</sub>-anchored Carbon Nanotubes for Enhanced Electrochemical Energy Storage. *J. Am. Chem. Soc.* **2011**, 133, 16291-16299. (DOI:10.1021/ja207285b)

(S2) Zhao, K. N.; Liu, F. N.; Niu, C. J.; Xu, W. W.; Dong, Y. F.; Zhang, L.; Xie, S. M.; Yan, M. Y.; Wei, Q. L.; Zhao, D. Y.; Mai, L. Q. Graphene Oxide Wrapped Amorphous Copper Vanadium Oxide with Enhanced Capacitive Behavior for High-Rate and Long-Life Lithium-Ion Battery Anodes. *Adv. Sci.* **2015**, 2, 1500154. (DOI:10.1002/advs.201500154)
